# Fascicles Split or Merge Every ~560 Microns Within the Human Cervical Vagus Nerve

Aniruddha R. Upadhye<sup>1,2</sup>, Chaitanya Kolluru<sup>1</sup>, Lindsey Druschel<sup>1,2</sup>, Luna Al Lababidi<sup>1</sup>,  
Sami S. Ahmad<sup>1</sup>, Dhariyat M. Menendez<sup>1,2</sup>, Ozge N. Buyukcelik<sup>1</sup>, Megan L. Settell<sup>3</sup>,  
Stephan L. Blanz<sup>3,11</sup>, Michael W. Jenkins<sup>1</sup>, David L. Wilson<sup>1</sup>, Jing Zhang<sup>4</sup>, Curtis  
Tatsuoka<sup>4,5</sup>, Warren M. Grill<sup>6,7,8,9</sup>, Nicole A. Pelot<sup>6</sup>, Kip A. Ludwig<sup>3,10,11</sup>, Kenneth J.  
Gustafson<sup>1,5</sup>, Andrew J. Shoffstall<sup>1,2\*</sup>

<sup>1</sup> Department of Biomedical Engineering, Case Western Reserve University, Cleveland, OH, United States of America <sup>2</sup> APT Center, Louis Stokes Cleveland VA Medical Center, Cleveland, OH, United States of America <sup>3</sup> Department of Biomedical Engineering, University of Wisconsin-Madison, Madison, WI, United States of America <sup>4</sup> Department of Population and Quantitative Health Sciences, Case Western Reserve University, Cleveland, OH, United States of America <sup>5</sup> FES Center, Louis Stokes Cleveland VA Medical Center, Cleveland, OH, United States of America <sup>6</sup> Department of Biomedical Engineering, Duke University, Durham, NC, United States of America <sup>7</sup> Department of Electrical and Computer Engineering, Duke University, Durham, NC, United States of America <sup>8</sup> Department of Neurobiology, Duke University, Durham, NC, United States of America <sup>9</sup> Department of Neurosurgery, Duke University, Durham, NC, United States of America <sup>10</sup> Department of Neurosurgery, University of Wisconsin-Madison, Madison, WI, United States of America <sup>11</sup> Wisconsin Institute of Neuroengineering (WITNe), University of Wisconsin-Madison, Madison, WI, USA

\* Corresponding Author

Andrew Shoffstall

Assistant Professor, Dept. of Biomedical Engineering

Case Western Reserve University

Cleveland, OH 44106

[Ajs215@case.edu](mailto:Ajs215@case.edu)

+1 216-368-1213

## 34 **1 Abstract**

35 Vagus nerve stimulation (VNS) is FDA approved for stroke rehabilitation, epilepsy, and  
36 depression; however, the vagus functional anatomy underlying the implant is poorly understood.  
37 We used microCT to quantify fascicular structure and neuroanatomy within human cervical vagus  
38 nerves. Fascicles split or merged every  $\sim 560 \mu\text{m}$  ( $17.8 \pm 6.1$  events/cm). The high degree of  
39 fascicular splitting and merging in humans may explain the clinical heterogeneity in patient  
40 responses.

## 41 **2 Main**

42 Electrical stimulation of the cervical vagus nerve (cVN) using implanted electrodes, more  
43 commonly known as cervical vagus nerve stimulation (cVNS), is an existing clinical therapy with  
44 an estimated global market size of over \$500 million dollars in 2018. This market is projected to  
45 expand at a compound annual growth rate of 11.4% to a size of nearly 1.2 billion dollars by  
46 2026.<sup>1</sup> Implanted vagus nerve stimulators are currently approved by the Food and Drug  
47 Administration (FDA) to treat epilepsy, depression, obesity and for stroke rehabilitation<sup>2-5</sup>, and  
48 are in clinical trials to treat diverse conditions including heart failure, diabetes, and rheumatoid  
49 arthritis.<sup>6-8</sup>

50 The vagus nerve at the cervical/neck level is an attractive target for neuromodulation  
51 therapies as it is easily identifiable under ultrasound and can be accessed with a well-  
52 established and relatively simple surgical procedure.<sup>9</sup> In humans, the cervical vagus consists of  
53 over 100,000 fibers; these include efferent fibers originating from the brainstem that innervate  
54 multiple visceral organs, including the lungs, heart, diaphragm, liver, and intestines, and their  
55 sensory fibers returning to the brainstem, which ultimately influence noradrenergic,  
56 serotonergic, and cholinergic inputs to the cortex.<sup>9-11</sup> As such, intervening at the cervical vagus

57 presents the opportunity to modify function both within the brain and the majority of organs  
58 within the viscera.<sup>12-21</sup>

59 Several recent studies in animal models have suggested that smaller, multi-contact  
60 electrodes may more selectively stimulate specific portions of the cervical vagus to take  
61 advantage of underlying functional organization to better isolate intended activation of  
62 therapeutic fibers from unwanted activation of off-target fibers.<sup>22,23</sup> The activation of low-  
63 threshold, large-diameter motor efferent fibers of the vagus that innervate the deep muscle of  
64 the necks putatively drives the most common side effects, causing cough, throat pain, voice  
65 alteration, and dyspnea reported in up to 66% of patients.<sup>24-29</sup> In a study of human patients  
66 implanted to treat heart failure, desired heart rate responses were achieved in only 13 of 106  
67 measurements taken at the 6- and 12-month end points, with stimulation thresholds  
68 predominantly limited by side effects attributable to concurrent activation of the neck muscles.<sup>24</sup>

69 The vagus nerve is known to have distinct functional organization at specific points along its  
70 path connecting the brainstem to the visceral organs.<sup>30,31</sup> Motor efferents responsible for deep  
71 neck muscle activation originate within the nucleus ambiguus in the medulla oblongata and  
72 eventually coalesce into the pharyngeal, superior laryngeal, and recurrent laryngeal branch,  
73 which innervate the pharyngeal, cricothyroid muscle, and cricoarytenoid muscles, respectively.  
74 Parasympathetic efferents originate from the dorsal motor nucleus of the vagus within the  
75 medulla oblongata and travel down the cervical vagus and eventually join vagal branches  
76 leading to and from the visceral organs. In contrast, sensory afferents leading from the visceral  
77 organs follow these same branches back to the main trunk that eventually becomes the cervical  
78 vagus.

79 While much is known about the proximal/distal connectivity of the vagus nerve, it is unknown  
80 if the human vagus at the cervical level has well-maintained functional organization, or lack  
81 thereof, that may account for the high degree of heterogeneous results across patients clinically.

82 Seminal studies by Sunderland have previously demonstrated that although the fascicles of  
83 major peripheral nerves divide and unite to form fascicular plexuses, there is substantial  
84 uniformity of fascicular arrangement of major nerves in the extremities.<sup>32,33</sup> For example, the  
85 palmar cutaneous and motor branches of the median nerve can be dissected proximally for  
86 several centimeters without significant cross branching.<sup>32,33</sup> Prior studies in human cadavers  
87 have focused on sparse sampling of the cervical vagus and subsequent 2D sectioning, which  
88 has yielded highly variable results with respect to number of fascicles from study to study with  
89 little information about the underlying functional somatotopy relevant to VNS.<sup>34-37</sup>

90 In this study, we collected 8 mid-cervical VNs from 5 human cadavers; each nerve was 5 cm  
91 long, and we focused our quantitative analyses on the middle 1 cm where the clinical VNS cuff  
92 would be surgically placed.<sup>38</sup> We stained the nerves with osmium tetroxide, and we imaged the  
93 nerves' morphology in three dimensions using microCT. We visualized and quantified the  
94 merging and splitting of fascicles along the 1 cm window (**Figures 1, 2**). Merging and splitting  
95 events were detected manually by an impartial observer (**Figure 1 A, C**), noting delineation by  
96 perineurium boundaries (**Figure 1 B**). We measured the distance over which the events  
97 occurred; merges spanned  $430 \pm 117$  ( $\mu\text{m} \pm \text{SD}$ ,  $n = 70$ ) and splits spanned  $461 \pm 108$  ( $n = 72$ )  
98 (**Figure 1 D**).

99 Over the middle 1 cm of all 8 nerves, there were  $17.8 \pm 6.1$  merging and splitting events  
100 (**Figure 2 B, C**), meaning that on average, each fascicle split or merged every  $\sim 560$   $\mu\text{m}$ . This  
101 number of events is much larger than expected from prior studies using histological  
102 techniques.<sup>34,35,37</sup> For the standard clinical VNS cuff electrode (LivaNova, London, UK) and a  
103 nerve with  $\sim 6.6$  fascicles (the mean value in our study), one would expect to observe  $\sim 14.2$  split  
104 or merge events over the 8 mm between the centers of the bipolar contact pair. These rapid  
105 shifts in fascicular organization would be challenging to observe using standard histological or

106 electron microscopy methods—typically using a single transverse cross section per nerve—and  
107 thus, prior studies on vagal morphology have not quantified this phenomenon.<sup>35,37</sup>

108 Merging and splitting events increased proportionally with the number of fascicles: more  
109 fascicles provided more opportunity for split/merge events (**Figure 2 A**,  $\beta = 1.76$ ,  $p = 0.032$ ). We  
110 used a two-level linear mixed model considering subject and spatial correlation between  
111 samples to evaluate for association. This degree of fascicular reorganization has substantial  
112 implications for VNS due to changing perineurium boundaries, which dramatically influences the  
113 distribution of the electric field.<sup>39</sup> The locations of fibers—and therefore proximity of fibers to the  
114 electrode contacts—also directly influences activation thresholds. Fascicles of a wide range of  
115 diameters participated in splitting and merging events; reorganization was not limited to a sub-  
116 population of small or large diameter fascicles (**Figure 2 D, E**).

117 Additionally, the cross-sectional areas of parent (“ab”) and summed children (“a” + “b”)  
118 fascicles before and after merging or splitting events (**Figure 2 F, G**) were calculated and  
119 compared (i.e., “ab” vs “a + b”). The parent areas were consistently larger than the sum of the  
120 children areas ( $\beta = 0.87$ ,  $p < 0.001$  and  $\beta = 1.14$ ,  $p < 0.001$ , for splitting and merging,  
121 respectively, where  $\beta$  refers to the slope of the mixed model).

122 Using the microCT images, we generated a 3D model (**Figure 3 A**) and quantified the  
123 fascicular morphology: number of fascicles, effective circular diameter, and cross-sectional area  
124 (**Figure 3 B-G**). Statistically, there was a net increase in mean fascicle diameter ( $p=0.0139$ ) in  
125 the cranial to caudal direction (**Figure 3D, E**) with negligible change in overall fascicular area  
126 ( $p=0.8399$ , **Figure 3 F, G**), suggesting a consolidation of the fascicles toward the inferior end of  
127 the cervical region. However, the large subject-to-subject variability is the overwhelming  
128 takeaway from the data (**Figure 3**). We did not observe any branches, although branches may  
129 occur in this region in some individuals.<sup>34</sup> While there was a trend toward a concomitant  
130 decrease in fascicle count with longitudinal distance (**Figure 3B, C**), the result was statistically

131 insignificant using a mixed-effects regression model ( $p=0.1672$ , data not shown), likely owing to  
 132 low sample number and the substantial variation between subjects for all three morphological  
 133 metrics.  
 134

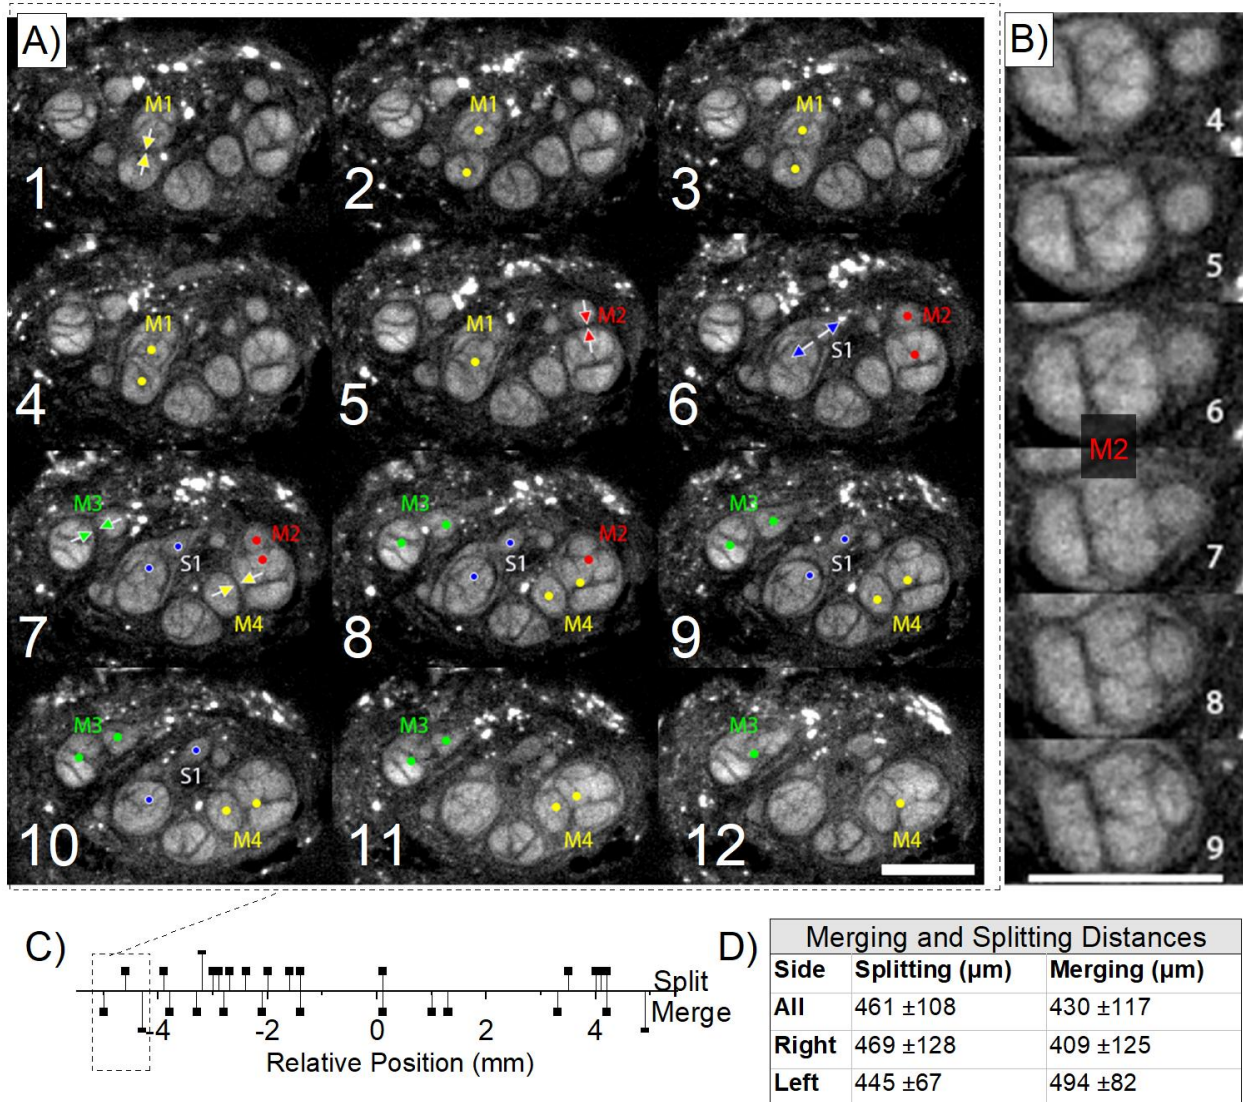

135

136 **Figure 1: Representative example of splitting and merging of fascicles along the rostral-to-**  
 137 **caudal direction within a 1.1 mm length of the human cVN (Specimen "2R") imaged with**  
 138 **microCT. A) The initiation of merging "M" and splitting "S" events are annotated with arrows: 4**  
 139 **merges (M1-M4) and 1 split (S1). Frames are read from left-to-right, top-to-bottom, as if reading**  
 140 **text. Frame-to-frame spacing is 100  $\mu\text{m}$  (12 frames = 1.1 mm total longitudinal span). Transverse-**  
 141 **plane scale bar shown in bottom right of the figure is 500  $\mu\text{m}$ . B) Example merging event "M2",**  
 142 **spanning 6 frames (500  $\mu\text{m}$ ). C) A representative line graph depicting event frequency (Split-**

143 positive, Merge- negative) along the middle 1 cm length of nerve. D) Table of mean distances  
144 (mean  $\pm$  SD) over which split and merge events ( $n=72$  and  $n=70$ , respectively) occur for all 8 VNs,  
145 sampled from either from the right or left side of the neck (middle 1 cm).

146

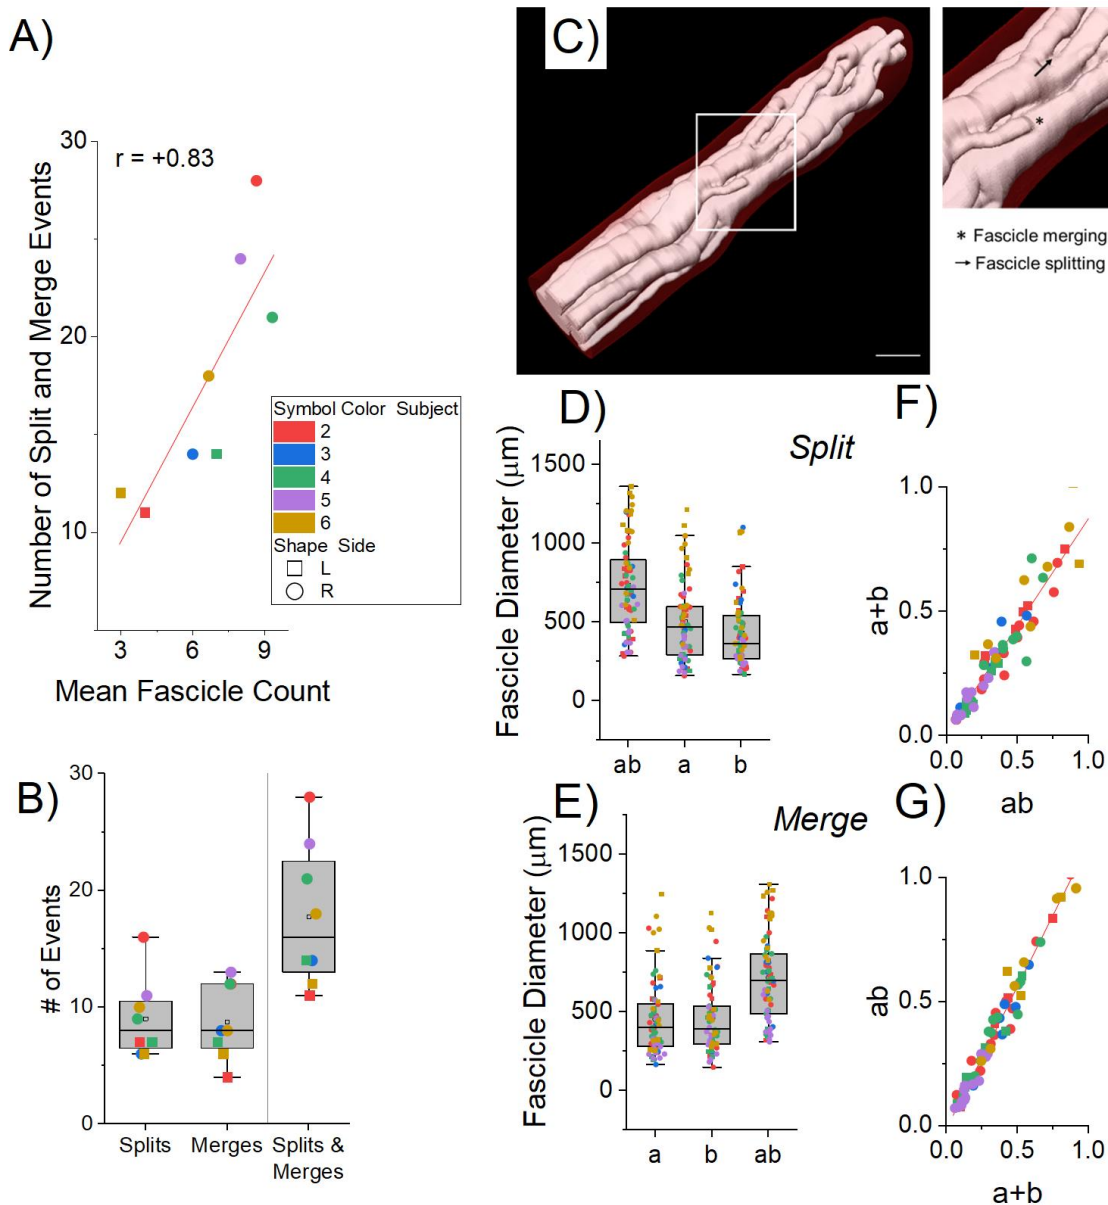

147

148 **Figure 2: Graphical representation of fascicular dynamics within the central 1 cm of the surgical**  
149 **window for VNS implantation across 8 nerves.** The quantification of these events was possible  
150 due to the high resolution along the longitudinal axis of the microCT dataset. A) Correlation  
151 between the number of fascicles and the number of split/merge events along the 1 cm length of  
152 nerve: subject number (color-coded, 2 – 6), left (square), right (circle). B) Box plot showing the  
153 distribution of the number of split/merge events across all samples. C) 3D visualization of a

154 representative 1 cm window within the cVN (Specimen "4R"). D, E) Box plot showing the  
 155 distribution of the diameters of parent fascicles and children (a, b or a+b, respectively) for all  
 156 merge and split events. F) Association plot of splitting fascicular summed areas of the children  
 157 (a+b, y-axis) with the areas of the parent (ab, x-axis), mixed model slope  $\beta=0.87$ ,  $p<0.001$ . G)  
 158 Association plot of merging fascicular areas of the parent (ab, y-axis) with the summed areas of  
 159 the children (a+b, x-axis), mixed model slope  $\beta=1.14$ ,  $p<0.001$ . Note that summed areas of the  
 160 children are consistently less than the area of the parent fascicle.

161

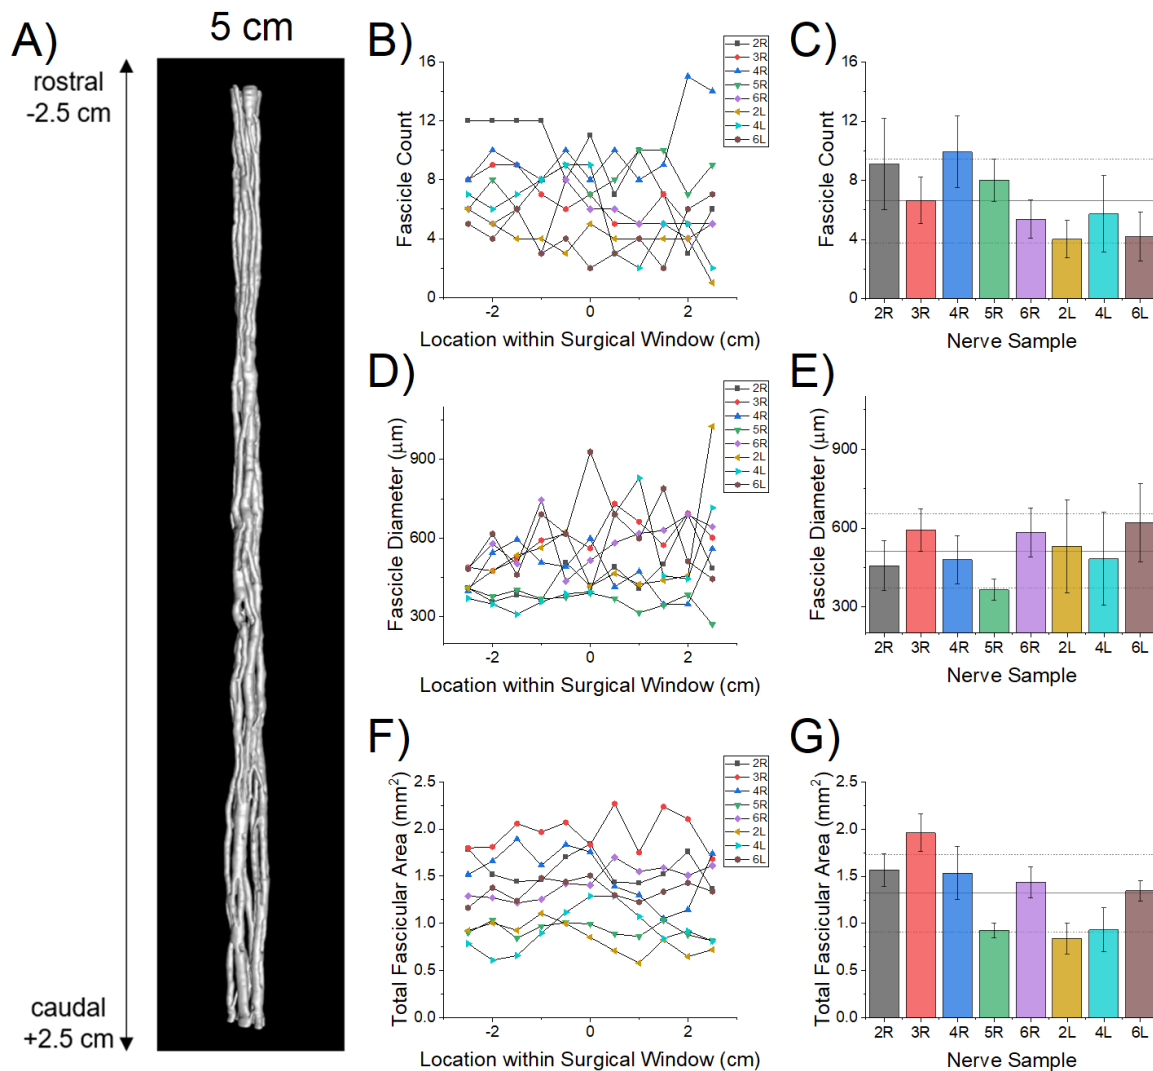

162

163 **Figure 3: Fascicle morphometry assessment within the central 5 cm of the human cVN**  
 164 **(Specimen "4R").** A) Representative 3D visualization of segmented microCT images. B, D, E)  
 165 Fascicle count, diameter, and area at 0.5 cm increments along the 5 cm surgical window for  
 166 each sample, where  $x = -2.5$  cm is the rostral end and  $x = +2.5$  cm is the caudal end. We also  
 167 averaged the data across the surgical window for each sample (C, E, G). Bars represent the



168 *mean ± SD across the sampled regions of the surgical window. Black horizontal lines represent*  
169 *the mean ± SD across all nerve samples.*

170

171 MicroCT enables unique three-dimensional visualization and quantification of vagal  
172 fascicular morphology over long lengths of nerve, enabling new insights into the spatial  
173 organization of the nerve that are essential for the design and analysis of effective and selective  
174 electrical stimulation therapies to treat diseases. MicroCT has been used extensively in  
175 orthopedic studies and other fields, but the imaging technique has only recently been applied to  
176 neural tissues. For example, one study reported a protocol for staining rat sciatic and pig vagus  
177 nerves, optimization of computational methods for high-resolution three-dimensional images of  
178 nerve fascicles, and development of image analysis techniques to facilitate segmentation and  
179 tracing of the fascicles.<sup>40</sup> The fascicle morphology measurements obtained from our microCT  
180 data were similar to those obtained by other groups.<sup>37</sup> Here, we demonstrated the unique value  
181 of microCT to quantify fascicular splitting and merging of the human cVN.

182 Given the magnitude of fascicular reorganization demonstrated by our data, current VNS  
183 cuff designs are not optimized to provide spatial selectivity. The current clinical standard  
184 involves surgical implantation of a cuff electrode that wraps helically around the entire nerve  
185 trunk, with bipolar contacts spanning ~270°, separated by 8 mm center-to-center. For a  
186 representative nerve from our study, this 8 mm span would traverse over a dozen fascicle  
187 splitting and merging events (min = 9.6, max = 22.4 events, from our limited size dataset).  
188 Further, the fascicular reorganization varies substantially between individuals. Given this intra-  
189 and inter-individual morphological heterogeneity of fascicles, these electrode designs are  
190 unlikely to allow selective activation of spatially localized target fibers within the cVN.

191 Computational modeling of the vagus nerve can be used to guide the engineering and  
192 design of neural stimulating devices<sup>41</sup>; the basis for these models requires anatomically  
193 accurate features that reflect the diversity observed across multiple human subjects. Currently,

194 computational modeling of VNS relies on longitudinal extrusion of segmented histological cross  
195 sections or simplified mock morphologies, which do not represent precise fascicle boundaries or  
196 longitudinal spatial variation.<sup>42-44 45 46,47</sup> Autonomic stimulation therapies will be advanced by a  
197 *priori* personalized surgical planning, device design, and device programming for autonomic  
198 stimulation therapies informed by computational models as used in other neural stimulation  
199 treatments.<sup>48</sup> However, to make personalized decisions and improve the accuracy of the  
200 computational predictions, better *in vivo* imaging modalities are needed to visualize and map the  
201 fascicular morphology with higher precision and resolution in both the transverse and the  
202 longitudinal planes.<sup>49</sup>

203 The fascicular anatomy of vagus nerve is highly complex and dynamic. Mapping nerves  
204 using microCT is an effective technique to visualize and quantify fascicle reorganization. We  
205 measured a mean of 17.8 split-or-merge events along 1 cm of the cervical vagus nerve (n=8  
206 samples), implying that there would be ~14 events along the bipolar electrode of current clinical  
207 VNS devices. The analysis of fascicle dynamics within the human VN provides a unique  
208 perspective into the morphology of the VN and suggests that morphology may have implications  
209 on VNS efficacy. Specifically, this analysis provides the foundation for building computational  
210 models to analyze and design therapies with improved selectivity reducing off target effects  
211 which can greatly improve patient's quality of life. Such therapies could lead to an overall  
212 improvement in clinical outcomes.

## 213 **3 Methods**

### 214 **3.1 Tissue Acquisition and Dissection**

215 We collected 8 mid-cervical vagus nerve samples from 5 formaldehyde fixed cadavers (3  
216 left nerves, 5 right nerves), secondary to use in medical school cadaver lab training. Since all  
217 the specimens were harvested from de-identified donor sources, and no protected personal

218 health information collected, a letter of IRB exemption (non-human-subjects determination) was  
219 sought and approved by the Case Western Reserve University Institutional Review Board.

220 Cadavers were already disarticulated prior to our dissection; we performed gross and fine  
221 dissection with standard tools to isolate the vagus nerve from surrounding tissues. We made a  
222 rostral cut directly beneath the skull (jugular foramen) approximately at the nodose ganglion.  
223 The caudal/distal cut was made at the level of clavicle. The harvested nerves were stored in 4%  
224 formalin solution until ready for staining. The VNS cuff electrode is clinically placed midway  
225 between the clavicle and the mastoid process, and the surgical incision is 3-4 cm long<sup>38</sup>; we  
226 therefore collected 5 cm of length for each nerve, centered around the approximate location of  
227 VNS cuff placement, which we refer to as the “surgical window” throughout the paper.

### 228 **3.2 Sample Preparation: Osmium Staining & Paraffin Embedding**

229 The vagus nerves were washed three times with 1X phosphate buffered saline (PBS),  
230 letting the sample shake on an orbital shaker for five minutes after each wash. Osmium  
231 tetroxide (1% v/v) was prepared with deionized water, and the nerves were left fully submerged  
232 in this solution for three days. The samples were then dehydrated with 70% and 95% ethanol  
233 with a deionized water solvent. The dehydration included two quick rinses of the samples with  
234 70% ethanol followed by a full wash and 30 minutes on the orbital shaker. This process was  
235 repeated twice with 70% ethanol, then three additional times with 95% ethanol. The nerves  
236 were stored in 70% ethanol for up to one week prior to embedding in paraffin.

237 The nerve samples were embedded in paraffin, mounted on a 3D printed plastic mold that fit  
238 the nerve. At the base of the mold, there were grooves every 5 mm, and these grooves were  
239 painted with a marking solution doped with barium sulfate to enhance sample navigation under  
240 X-ray.

### 241 **3.3 MicroCT and Image Sub-Volume Reconstruction**

242 For the imaging studies, we utilized a Quantum GX2 microCT Imaging System (Perkin  
243 Elmer, Waltham, MA, USA). The embedded nerve was placed in a 36 mm bed. The microCT  
244 scanner was warmed up as recommended by the manufacturer, and the nerve was scanned  
245 and reconstructed at 36 mm field of view (FOV). The resultant image block was 72  $\mu\text{m}$  in voxel  
246 resolution (isotropic). Each scan spanned 1.8 cm of nerve length, with 0.3 cm overlap (i.e.,  
247 16.67%) between adjacent blocks to serve image reconstruction.

248 Post-hoc sub-block reconstruction was performed with Rigaku software provided by  
249 Perkin Elmer. Each sub-block reconstruction was a 5.12 x 5.12 x 5.12  $\text{mm}^3$  cube and each  
250 adjacent sub-blocks overlapped by 0.1 mm (20% overlap); the resolution of final reconstruction  
251 was 10  $\mu\text{m}$  voxel size (isotropic). Images were exported as DICOM files for further processing.  
252 After down-sampling frames along the longitudinal axis by 10-fold, blocks were co-registered  
253 and stitched using ImageJ (FIJI, Version 2.1.0/1.53c).<sup>50</sup> The final image dataset consisted of  
254 pairwise stitched, evenly spaced (100  $\mu\text{m}$  inter-frame spacing) TIFF images. 3D visualizations  
255 were generated by Simpleware™ ScanIP software (Synopsys, Mountain View, CA).

### 256 **3.4 Fascicle Morphometric Analysis**

257 VN samples were analyzed using ImageJ (FIJI, Version 2.1.0/1.53c) to select, outline, and  
258 measure individual fascicles, using the elliptical selection tool. Fascicle boundaries were  
259 manually estimated based on visual inspection. For morphometric analysis, the operators  
260 evaluated fascicle parameters at 0.5 cm intervals along the length of the 5 cm cervical window  
261 for each nerve. While manual outlining potentially introduces subjective differences between  
262 operators, the magnitude of these differences was deemed negligible based on prior inter-  
263 operator analyses. Image scaling was set according to the microCT manufacturer provided  
264 calibration factor: 1 pixel = 10  $\mu\text{m}$ , 1.0-pixel aspect ratio. Area, minimum & maximum gray  
265 intensity values, shape descriptors, mean intensity value, centroid coordinates, and ellipse-fit

266 measurements (including major and minor axes, and effective diameter – the average of major  
267 and minor axis) were calculated.

### 268 **3.5 Merging and Splitting Analysis**

269 The splitting and merging analyses were conducted for the central 1 cm of the cervical  
270 vagus nerve, within the 5 cm of the surgical window that we defined in this paper. The frames in  
271 this region were isolated and loaded as an image sequence on ImageJ and analyzed from the  
272 rostral end to caudal end. All split/merge analyses were conducted manually.

#### 273 **3.5.1 *Defining an Event***

274 During our analysis, we defined the start and completion of a split or merge event based on  
275 the fascicle boundaries. We characterized an event as a start of a split when a parent fascicle,  
276 coined “ab”, appeared to create a bud or partition within the center of the otherwise consistently  
277 shaded fascicle (e.g., **Figure 1B**). The event was marked as complete when parent fascicle “ab”  
278 completely formed independent circular/ellipsoidal independent children fascicles “a” and “b”  
279 with their own perineurium sheath around the fascicles. In most cases, the perineurium sheath  
280 is well defined and visible within the microCT. In some cases, the perineurium is inferred when  
281 there is separation of two circular/ellipsoidal geometries. Conversely, we characterized an event  
282 as a merge when fascicle “a” merged into another fascicle “b”, resulting in a combined fascicle  
283 “ab”, applying the same logic as described above. When multiple events occurred  
284 simultaneously (e.g., one fascicle splitting into three fascicles), we considered it as two different  
285 splitting events. We did not observe any event where three fascicles merged to become one  
286 fascicle in the exact same frame.

#### 287 **3.5.2 *Measurements and Analysis***

288 To measure the distance over which the event was taking place, the starting and the ending  
289 frames were recorded. With the total number of frames, we calculate the distance over which

290 the event takes place. Using ImageJ, the fascicles were measured at the starting and the  
291 ending frames (as mentioned in the morphometric analysis section).

292 We recorded the number of splitting and merging events across the central 1 cm of each  
293 sample and calculated the average number of events across  $n = 8$  samples. We counted the  
294 number of fascicles in the first, middle, and last frames of the 1 cm window and calculated the  
295 mean fascicle count in the sample. We then determined the number of events/fascicle/cm using  
296 the values calculated as mentioned previously.

### 297 **3.6 Statistics**

298 Our primary quantitative metric was focused on fascicle splitting and merging events across  
299 our human cadaver nerve specimens ( $n = 8$ ). Descriptive statistics presented in the text include  
300 mean and standard deviations unless otherwise denoted. Box plots presented in **Figure 2**  
301 display individual data points (colored according to the associated legends), median values  
302 (horizontal center line), mean values (black box), interquartile range (upper and lower box  
303 edge), and outliers (whiskers). Bar plots presented in **Figure 3** display mean values (bar height)  
304 and standard deviation (error bars), with horizontal lines in the background representing the  
305 whole sample mean and standard deviations.

306 For all statistical tests described below, Two-sided Type I error = 0.05 was adopted.  
307 Analysis was performed using R version 4.0.2.

308 Specifically, we were interested in evaluating the relationship between the number of  
309 fascicles contained within nerve specimens and the number of splitting or merging events  
310 observed (**Figure 2 A**). The association between the average number of fascicles at the surgical  
311 window and the number of events along the window was investigated with a two-level linear  
312 mixed model with subject and (left or right) side-level random intercepts.

313 We were also interested in evaluating the conservation of fascicular area before-and-after  
314 splitting and merging events (**Figure 2 F, G**). In order to study the association between  
315 fascicular area of the parent ( $ab$ ) and summed areas of the children ( $a+b$ ), we adopted a three-  
316 level hierarchical linear mixed model with subject-level and side-level random intercept with  
317 exponential spatial correlation structure for same side windows.

318 Similar 3-level models, as described above, were respectively used to explore the spatial  
319 trend of outcomes along the surgical window (rostral-to-caudal) for fascicular area, mean  
320 diameter, and fascicle count (results shared in text).

### 321 **3.7 Methodological Limitations**

322 As with standard histological processes, the staining and fixative reagents can cause  
323 dehydration and shrinkage to tissues. Per prior publications, we anticipate shrinkage could  
324 contribute up to 20% reduction in apparent diameters. However, we did not directly estimate this  
325 in our study, and therefore did not apply any correction factors in our dataset. Further, we  
326 sampled nerves from 5 cadavers, but due to the source of cadaver donation, we were unable to  
327 acquire any demographics. This study can be expanded in the future to greater population  
328 sample size to estimate population variability drive by demographic differences.

## 329 **4 Acknowledgements**

330 The authors would like to thank Rebecca Enterline and Andrew Crofton for their contributions  
331 in sample acquisition and handling. We would like to thank Matt Schiefer for his role in the  
332 acquisition of equipment necessary for the execution of our studies. We would also like to  
333 recognize William Woodfint for his contributions to data review.

334 This work has been supported by NIH SPARC Program 1OT2OD025340, US Dept. of  
335 Veterans Affairs 1I51BX004384, the Cleveland VA APT Center, and Case Western Reserve  
336 University. The opinions expressed in this article are the author's own and do not reflect the view

337 of the National Institutes of Health, the Department of Health and Human Services, or the United  
338 States government.

## 339 **5 Competing Interests Statement**

340 KAL is a scientific board member and has stock interests in NeuroOne Medical Inc., a  
341 company developing next generation epilepsy monitoring devices. KAL is also paid member of  
342 the scientific advisory board of Cala Health, Blackfynn, Abbott and Battelle. KAL also is a paid  
343 consultant for Galvani and Boston Scientific. KAL and AJS are consultants to and co-founders of  
344 Neuronoff Inc. None of these associations are directly relevant to the work presented in this  
345 manuscript.



## 346 6 References

- 347 1 Insights, F. B. *Vagus Nerve Stimulation Market Size, Trends | Report, 2026*,  
348 <[https://www.fortunebusinessinsights.com/industry-reports/vagus-nerve-stimulation-vns-](https://www.fortunebusinessinsights.com/industry-reports/vagus-nerve-stimulation-vns-market-101184)  
349 <[market-101184](https://www.fortunebusinessinsights.com/industry-reports/vagus-nerve-stimulation-vns-market-101184)> (2019).
- 350 2 Administration, U. S. F. D. *FDA 2021 PMA approval P2100007 for Vivistim System*,  
351 <<http://www.accessdata.fda.gov/scripts/cdrh/cfdocs/cfpma/pma.cfm?id=P210007>>  
352 (2021).
- 353 3 Administration, U. S. F. D. *FDA 2015 PMA approval P130019 for Maestro Rechargeable*  
354 *System*,  
355 <<http://www.accessdata.fda.gov/scripts/cdrh/cfdocs/cfpma/pma.cfm?id=P130019>>  
356 (2015).
- 357 4 Administration, U. S. F. D. *FDA 2005 PMA approval P970003 for VNS Therapy System*,  
358 <<http://www.accessdata.fda.gov/scripts/cdrh/cfdocs/cfpma/pma.cfm?id=P970003S050>>  
359 (2005).
- 360 5 Administration, U. S. F. D. *FDA 1997 PMA approval P970003 for VNS Therapy System*,  
361 <<http://www.accessdata.fda.gov/scripts/cdrh/cfdocs/cfpma/pma.cfm?id=P970003>>  
362 (1997).
- 363 6 Drewes. *Treatment of Complications to Diabetic Autonomic Neuropathy With Vagus*  
364 *Nerve Stimulation*, <<https://clinicaltrials.gov/ct2/show/NCT04143269>> (2021).
- 365 7 Corporation, S. M. *Long Term Extension Study of the Safety and Efficacy of*  
366 *Neurostimulation Using a Vagus Nerve Stimulation Device in Patients With Rheumatoid*  
367 *Arthritis*, <<https://clinicaltrials.gov/ct2/show/NCT04862117>> (2021).
- 368 8 Corporation, B. S. *Neural Cardiac Therapy for Heart Failure Study*,  
369 <<https://clinicaltrials.gov/ct2/show/NCT01385176>> (2021).
- 370 9 Groves, D. A. & Brown, V. J. Vagal nerve stimulation: a review of its applications and  
371 potential mechanisms that mediate its clinical effects. *Neurosci Biobehav Rev* **29**, 493-  
372 500, doi:10.1016/j.neubiorev.2005.01.004 (2005).
- 373 10 Pavlov, V. A. & Tracey, K. J. The vagus nerve and the inflammatory reflex--linking  
374 immunity and metabolism. *Nat Rev Endocrinol* **8**, 743-754, doi:10.1038/nrendo.2012.189  
375 (2012).
- 376 11 Dorr, A. E. & Debonnel, G. Effect of vagus nerve stimulation on serotonergic and  
377 noradrenergic transmission. *J Pharmacol Exp Ther* **318**, 890-898,  
378 doi:10.1124/jpet.106.104166 (2006).
- 379 12 Beekwilder, J. P. & Beems, T. Overview of the clinical applications of vagus nerve  
380 stimulation. *J Clin Neurophysiol* **27**, 130-138, doi:10.1097/WNP.0b013e3181d64d8a  
381 (2010).
- 382 13 Bonaz, B., Sinniger, V. & Pellissier, S. The Vagus Nerve in the Neuro-Immune Axis:  
383 Implications in the Pathology of the Gastrointestinal Tract. *Front Immunol* **8**, 1452,  
384 doi:10.3389/fimmu.2017.01452 (2017).
- 385 14 Bottomley, J. M., LeReun, C., Diamantopoulos, A., Mitchell, S. & Gaynes, B. N. Vagus  
386 nerve stimulation (VNS) therapy in patients with treatment resistant depression: A  
387 systematic review and meta-analysis. *Comprehensive Psychiatry* **98**, 152156,  
388 doi:<https://doi.org/10.1016/j.comppsy.2019.152156> (2020).
- 389 15 Chakravarthy, K., Chaudhry, H., Williams, K. & Christo, P. J. Review of the Uses of  
390 Vagal Nerve Stimulation in Chronic Pain Management. *Curr Pain Headache Rep* **19**, 54,  
391 doi:10.1007/s11916-015-0528-6 (2015).

- 392 16 Kin, I. *et al.* Vagus Nerve Stimulation with Mild Stimulation Intensity Exerts Anti-  
393 Inflammatory and Neuroprotective Effects in Parkinson's Disease Model Rats.  
394 *Biomedicines* **9**, 789, doi:10.3390/biomedicines9070789 (2021).
- 395 17 Koopman, F. A., van Maanen, M. A., Vervoordeldonk, M. J. & Tak, P. P. Balancing the  
396 autonomic nervous system to reduce inflammation in rheumatoid arthritis. *J Intern Med*  
397 **282**, 64-75, doi:10.1111/joim.12626 (2017).
- 398 18 Marangell, L. B. *et al.* A 1-year pilot study of vagus nerve stimulation in treatment-  
399 resistant rapid-cycling bipolar disorder. *J Clin Psychiatry* **69**, 183-189,  
400 doi:10.4088/jcp.v69n0203 (2008).
- 401 19 Pruitt, D. T. *et al.* Vagus Nerve Stimulation Delivered with Motor Training Enhances  
402 Recovery of Function after Traumatic Brain Injury. *J Neurotrauma* **33**, 871-879,  
403 doi:10.1089/neu.2015.3972 (2016).
- 404 20 Sarr, M. G. *et al.* The EMPOWER study: randomized, prospective, double-blind,  
405 multicenter trial of vagal blockade to induce weight loss in morbid obesity. *Obes Surg* **22**,  
406 1771-1782, doi:10.1007/s11695-012-0751-8 (2012).
- 407 21 Yin, J., Ji, F., Gharibani, P. & Chen, J. D. Vagal Nerve Stimulation for Glycemic Control  
408 in a Rodent Model of Type 2 Diabetes. *Obes Surg* **29**, 2869-2877, doi:10.1007/s11695-  
409 019-03901-9 (2019).
- 410 22 Fitchett, A., Mastitskaya, S. & Aristovich, K. Selective Neuromodulation of the Vagus  
411 Nerve. *Front Neurosci* **15**, 685872, doi:10.3389/fnins.2021.685872 (2021).
- 412 23 Ordelman, S. C., Kornet, L., Cornelussen, R., Buschman, H. P. & Veltink, P. H.  
413 Selectivity for specific cardiovascular effects of vagal nerve stimulation with a multi-  
414 contact electrode cuff. *IEEE Trans Neural Syst Rehabil Eng* **21**, 32-36,  
415 doi:10.1109/TNSRE.2012.2214058 (2013).
- 416 24 De Ferrari, G. M. *et al.* Long-term vagal stimulation for heart failure: Eighteen month  
417 results from the NEural Cardiac TherApy foR Heart Failure (NECTAR-HF) trial. *Int J*  
418 *Cardiol* **244**, 229-234, doi:10.1016/j.ijcard.2017.06.036 (2017).
- 419 25 Group, T. V. N. S. S. A randomized controlled trial of chronic vagus nerve stimulation for  
420 treatment of medically intractable seizures. *Neurology* **45**, 224-230,  
421 doi:10.1212/wnl.45.2.224 (1995).
- 422 26 Handforth, A. *et al.* Vagus nerve stimulation therapy for partial-onset seizures: a  
423 randomized active-control trial. *Neurology* **51**, 48-55, doi:10.1212/wnl.51.1.48 (1998).
- 424 27 Nicolai, E. N. *et al.* Sources of off-target effects of vagus nerve stimulation using the  
425 helical clinical lead in domestic pigs. *J Neural Eng* **17**, 046017, doi:10.1088/1741-  
426 2552/ab9db8 (2020).
- 427 28 Morris, G. L., 3rd *et al.* Evidence-based guideline update: vagus nerve stimulation for the  
428 treatment of epilepsy: report of the guideline development subcommittee of the american  
429 academy of neurology. *Epilepsy Curr* **13**, 297-303, doi:10.5698/1535-7597-13.6.297  
430 (2013).
- 431 29 Sackeim, H. A. *et al.* Vagus nerve stimulation (VNS) for treatment-resistant depression:  
432 efficacy, side effects, and predictors of outcome. *Neuropsychopharmacology* **25**, 713-  
433 728, doi:10.1016/S0893-133X(01)00271-8 (2001).
- 434 30 Câmara, R. & Griessenauer, C. J. in *Nerves and Nerve Injuries* (eds R. Shane Tubbs *et*  
435 *al.*) 385-397 (Academic Press, 2015).
- 436 31 Ellis, H. CLINICAL ANATOMY: A REVISION AND APPLIED ANATOMY FOR CLINICAL  
437 STUDENTS. *Annals of Surgery* **159**, 31-35 (1964).

- 438 32 Sunderland Sydney, S. *Nerve and Nerve Injuries*. Pages 841–854, (Baltimore, Williams  
439 and Wilkins Co., 1968).
- 440 33 Lee, S. K. & Wolfe, S. W. Peripheral nerve injury and repair. *J Am Acad Orthop Surg* **8**,  
441 243-252, doi:10.5435/00124635-200007000-00005 (2000).
- 442 34 Hammer, N. *et al.* Human vagus nerve branching in the cervical region. *PLoS One* **10**,  
443 e0118006, doi:10.1371/journal.pone.0118006 (2015).
- 444 35 Hammer, N. *et al.* Cervical vagus nerve morphometry and vascularity in the context of  
445 nerve stimulation - A cadaveric study. *Sci Rep* **8**, 7997, doi:10.1038/s41598-018-26135-  
446 8 (2018).
- 447 36 Kawagishi, K. *et al.* Tyrosine hydroxylase-immunoreactive fibers in the human vagus  
448 nerve. *J Clin Neurosci* **15**, 1023-1026, doi:10.1016/j.jocn.2007.08.032 (2008).
- 449 37 Pelot, N. A. *et al.* Quantified Morphology of the Cervical and Subdiaphragmatic Vagus  
450 Nerves of Human, Pig, and Rat. *Frontiers in Neuroscience* **14**,  
451 doi:10.3389/fnins.2020.601479 (2020).
- 452 38 Giordano, F., Zicca, A., Barba, C., Guerrini, R. & Genitori, L. Vagus nerve stimulation:  
453 Surgical technique of implantation and revision and related morbidity. *Epilepsia* **58**, 85-  
454 90, doi:<https://doi.org/10.1111/epi.13678> (2017).
- 455 39 Grinberg, Y., Schiefer, M. A., Tyler, D. J. & Gustafson, K. J. Fascicular perineurium  
456 thickness, size, and position affect model predictions of neural excitation. *IEEE Trans*  
457 *Neural Syst Rehabil Eng* **16**, 572-581, doi:10.1109/TNSRE.2008.2010348 (2008).
- 458 40 Thompson, N. *et al.* MicroCT optimisation for imaging fascicular anatomy in peripheral  
459 nerves. *Journal of neuroscience methods* **338**, 108652-108652,  
460 doi:10.1016/j.jneumeth.2020.108652 (2020).
- 461 41 Musselman, E. D., Cariello, J. E., Grill, W. M. & Pelot, N. A. ASCENT (Automated  
462 Simulations to Characterize Electrical Nerve Thresholds): A pipeline for sample-specific  
463 computational modeling of electrical stimulation of peripheral nerves. *PLoS Comput Biol*  
464 **17**, e1009285, doi:10.1371/journal.pcbi.1009285 (2021).
- 465 42 Aristovich, K. *et al.* Model-based geometrical optimisation and in vivo validation of a  
466 spatially selective multielectrode cuff array for vagus nerve neuromodulation. *J Neurosci*  
467 *Methods* **352**, 109079, doi:10.1016/j.jneumeth.2021.109079 (2021).
- 468 43 Dali, M. *et al.* Model based optimal multipolar stimulation without a priori knowledge of  
469 nerve structure: application to vagus nerve stimulation. *Journal of neural engineering* **15**,  
470 046018, doi:10.1088/1741-2552/aabeb9 (2018).
- 471 44 Bucksot, J. E. *et al.* Flat electrode contacts for vagus nerve stimulation. *PLoS One* **14**,  
472 e0215191, doi:10.1371/journal.pone.0215191 (2019).
- 473 45 Pelot, N. A., Behrend, C. E. & Grill, W. M. Modeling the response of small myelinated  
474 axons in a compound nerve to kilohertz frequency signals. *J Neural Eng* **14**, 046022,  
475 doi:10.1088/1741-2552/aa6a5f (2017).
- 476 46 Helmers, S. L. *et al.* Application of a computational model of vagus nerve stimulation.  
477 *Acta Neurol Scand* **126**, 336-343, doi:10.1111/j.1600-0404.2012.01656.x (2012).
- 478 47 Arle, J. E., Carlson, K. W. & Mei, L. Investigation of mechanisms of vagus nerve  
479 stimulation for seizure using finite element modeling. *Epilepsy Research* **126**, 109-118,  
480 doi:<https://doi.org/10.1016/j.epilepsyres.2016.07.009> (2016).
- 481 48 McIntyre, C. C. & Foutz, T. J. Computational modeling of deep brain stimulation. *Handb*  
482 *Clin Neurol* **116**, 55-61, doi:10.1016/B978-0-444-53497-2.00005-X (2013).
- 483 49 Settell, M. L. *et al.* In vivo visualization of pig vagus nerve 'vagotomy' using ultrasound.  
484 *bioRxiv*, 2020.2012.2024.424256, doi:10.1101/2020.12.24.424256 (2021).

485 50 Preibisch, S., Saalfeld, S. & Tomancak, P. Globally optimal stitching of tiled 3D  
486 microscopic image acquisitions. *Bioinformatics* **25**, 1463-1465,  
487 doi:10.1093/bioinformatics/btp184 (2009).  
488

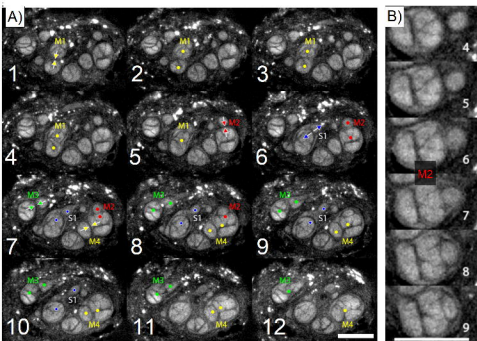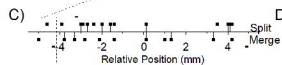

**D)** **Merging and Splitting Distances**

| Side  | Splitting ( $\mu\text{m}$ ) | Merging ( $\mu\text{m}$ ) |
|-------|-----------------------------|---------------------------|
| All   | $461 \pm 108$               | $430 \pm 117$             |
| Right | $469 \pm 128$               | $409 \pm 125$             |
| Left  | $445 \pm 67$                | $494 \pm 82$              |

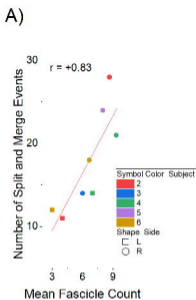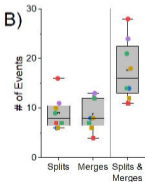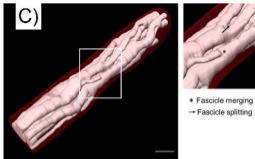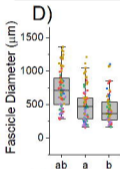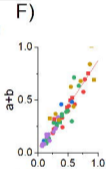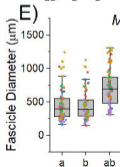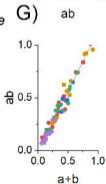

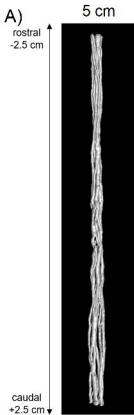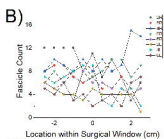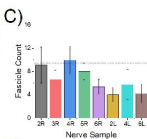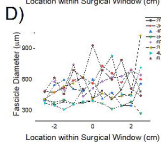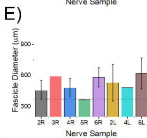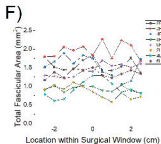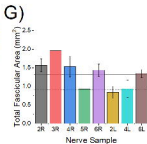

Source: http://biorxiv.org/content/10.1101/2021.11.09.467343v2.full.pdf
